# Supplementary material for: NiO/Perovskite Heterojunction Contact Engineering for Highly Efficient and Stable Perovskite Solar Cells
Source: PubMed Central journal article supplement (PMC7284208; doi:10.1002/advs.201903044), 2020-04-07
Supplement: ADVS-7-1903044-s001.pdf [file ADVS-7-1903044-s001.pdf]

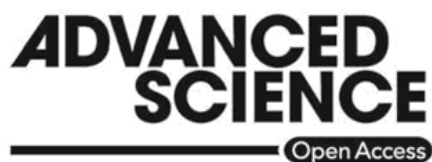

## Supporting Information

for *Adv. Sci.*, DOI: 10.1002/advs.201903044

NiO/Perovskite Heterojunction Contact Engineering  
for Highly Efficient and Stable Perovskite Solar Cells

*Bingjuan Zhang, Jie Su, Xing Guo, Long Zhou, Zhenhua Lin,\*  
Liping Feng, Jincheng Zhang, Jingjing Chang,\* and Yue Hao*

((Supporting Information can be included here using this template))

Copyright WILEY-VCH Verlag GmbH & Co. KGaA, 69469 Weinheim, Germany, 2020.

## Supporting Information

### **NiO/Perovskite Heterojunction Contact Engineering for Highly Efficient and Stable Perovskite Solar Cells**

*Bingjuan Zhang,<sup>a</sup> Jie Su,<sup>a,b</sup> Xing Guo,<sup>a</sup> Long Zhou,<sup>a</sup> Zhenhua Lin,<sup>a,\*</sup> Liping Feng,<sup>c</sup> Jincheng Zhang,<sup>a,b</sup> Jingjing Chang,<sup>a,b,\*</sup> Yue Hao<sup>a,b</sup>*

B, Zhang, Dr. J. Su, X. Guo, L. Zhou, Dr. Z. Lin, Prof. J. Zhang, Prof. J. Chang, Prof. Y. Hao  
State Key Discipline Laboratory of Wide Band Gap Semiconductor Technology, Shaanxi  
Joint Key Laboratory of Graphene, Advanced Interdisciplinary Research Center for Flexible  
Electronics, School of Microelectronics, Xidian University, 2 South Taibai Road, Xi'an,  
710071, China. Email: zhlin@xidian.edu.cn, jjingchang@xidian.edu.cn  
Prof. L. Feng,  
State Key Laboratory of Solidification Processing, Northwestern Polytechnical University,  
Xi'an, Shaanxi, 710072, P. R. China.

### **Experimental Section**

**Materials:** All the materials, such as nickel nitrate ( $\text{Ni}(\text{NO}_3)_2 \cdot 6\text{H}_2\text{O}$ ), cesium bromide (CsBr), MAI (99.9 %, Dyesol), FAI (99.9 %, Dyesol), lead (II) iodide ( $\text{PbI}_2$ , 99.999 %, Alfa), lead (II) chloride ( $\text{PbCl}_2$ , 99.999 %, Alfa), phenyl-C61-butyric acid methyl ester ( $\text{PC}_{61}\text{BM}$ , 98 %, nano-c), N,N'-dimethylformamide (99.8 %, Aladdin), chlorobenzenes (99.8 %, Sigma), isopropanol (99.5 %, Sigma), bathocuproine (96 %, Alfa), 2-methoxyethanol, acetylacetone (99.8 %, Sigma) and Methanol were used as received without further purification. The CsBr modification layer was prepared by dissolving CsBr in Methanol to form 1 mg/mL, 2.5 mg/mL and 5.0 mg/mL CsBr solution.

**Film Formation and Device Fabrication:** Planar PSCs were fabricated on prepatterned indium tin oxide (ITO) glass substrates (around  $2 \times 2.5 \text{ cm}^2$  in size,  $10 \Omega$  per square). The

patterned transparent conducting oxide (TCO) glass substrates were sequentially ultrasonic cleaned with detergent, deionized water, acetone, and IPA at 50 °C for 20 min, respectively. Then, the TCO substrates were dried with nitrogen and treated in a UV ozone oven for 15 min. The NiO<sub>x</sub> hole transport layer was made by dissolving 270.79 mg Ni(NO<sub>3</sub>)<sub>2</sub> • 6H<sub>2</sub>O (1.0 mmol) in 2-methoxyethanol (10 mL). After the solution was stirred at 50 °C for 1 h, 100 μL acetylacetone was added to the solution, and then the solution was further stirred overnight at room temperature. This method is based on the method reported in Liu's article.<sup>1</sup> A thin layer of NiO<sub>x</sub> was spin coated on the substrates at 3000 rpm for 45 s and annealed at 250 °C for 45 min. Cool down the temperature of NiO<sub>x</sub>-covered TCO substrates to room temperature. Then, a thin layer of CsBr was spin coated on the NiO<sub>x</sub>-covered TCO substrates at 3000 rpm for 30 s and annealed at 250 °C for 10 min in air. After that, the substrates were transferred into a nitrogen-filled glove box. PbI<sub>2</sub> (1.36 mol) and PbCl<sub>2</sub> (0.24 mol) were dissolved in the solvent of DMF and stirred for 2 h at 75 °C. MAI (70 mg) and FAI (30 mg) were dissolved in the solvent of IPA with 0.9 vol% DMF. Around 60 μL PbX<sub>2</sub> precursors preheated to 75 °C were transferred by pipettes to the NiO<sub>x</sub>-covered TCO substrates. The spin coating process was programmed to run at 3000 rpm for 45 s. Then, MAI was spin coated on top of the dried PbI<sub>2</sub> layer at room temperature at 3000 rpm for 45 s. All of the films were thermally annealed on the hot plate at 100 °C for 10 min. Next, a layer of PCBM (20 mg/mL in chlorobenzene) was spin coated on the top of the perovskite layer at 2000 rpm for 40 s. After that, a thin layer of BCP (0.5 mg/mL in IPA) was spin coated on the top of the PCBM layer. The devices were finished by thermally evaporated 100 nm Ag. All the devices had an effective area of 7.5 mm<sup>2</sup> defined by the metal mask.

**Materials and Device Characterization:** The morphology measurement of the perovskite layers was taken by SEM (JSM-7800F). XRD test was conducted on Bruker D8 Advance

XRD. XPS experiments were carried out on the Escalab 250Xi using monochromatic Al-K $\alpha$  (1486.6 eV) as the radiation source. The film morphology was investigated by a tapping mode atomic force microscopy (AFM) (Bruker ICON-PKG AFM). Space charge limited current (SCLC) and photoluminescence spectra were collected on an Edinburgh Instruments FLS920, and the excitation wavelength was 633 nm. The UV - vis absorption spectra were recorded with an UV - visible spectrophotometer (Perkin-Elmer Lambda 950). Photovoltaic performances were measured by using a Keithley 2400 source meter under simulated sunlight from XES-70S1 solar simulator matching the AM 1.5G standard with an intensity of 100 mW/cm<sup>2</sup>. The system was calibrated against an NREL certified silicon reference solar cell. IPCEs of PSCs were measured by the solar cell quantum efficiency measurement system (SCS10-X150, Zolix instrument. Co. Ltd). TR-PL spectra were measured using the Pico Quant Fluotime 300 by using a 510 nm picosecond pulsed laser. Transient photocurrent measurement was performed with a system excited by a 532 nm (1000 Hz, 3.2 ns) pulse laser. Transient photovoltage measurement was performed with the same system excited by a 405 nm (50 Hz, 20 ms) pulse laser. A digital oscilloscope (Tektronix, D4105) was used to record the photocurrent or photovoltage decay process with a sampling resistor of 50  $\Omega$  or 1 M $\Omega$ , respectively.

**First-principles calculations:** The first-principle calculations were performed in the framework of density functional theory (DFT) using the VASP code. The Perdew-Burke-Ernzerhof (PBE) functional with the projector augmented wave (PAW) method was used for geometry optimization and self-consistent calculations. The van der Waals interaction was considered using DFT-D2 method. The cut-off energy of 400 eV and Monkhorst-Pack k-point meshes spanning less than 0.015  $\text{\AA}^{-3}$  in the Brillouin zone were chosen. The convergence criteria for energy change and maximum force were set as  $10^{-5}$  eV and 0.01 eV/ $\text{\AA}$ ,

respectively. Vacuums of 20 Å were added perpendicular to the interfaces to minimize the artificial interlayer interactions.

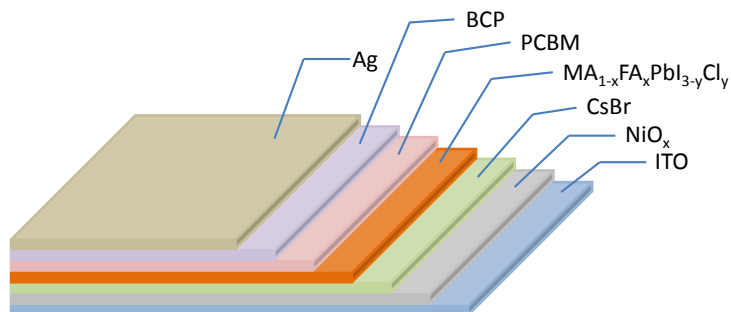

**Figure S1.** The device architecture of the inverted planar PSCs

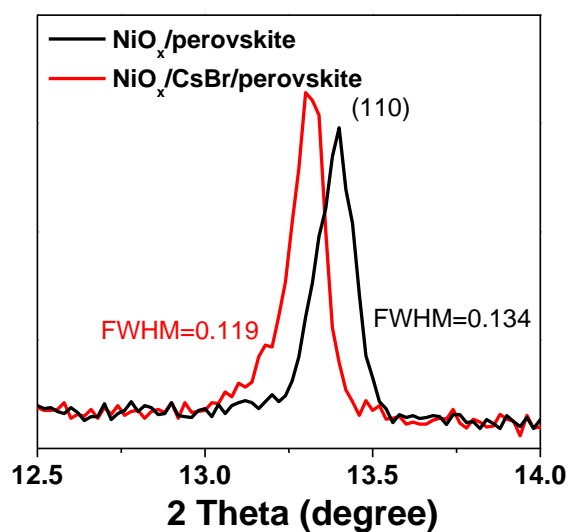

**Figure S2.** XRD spectra of perovskite films deposited on pristine NiO<sub>x</sub> and CsBr modified NiO<sub>x</sub> thin films.

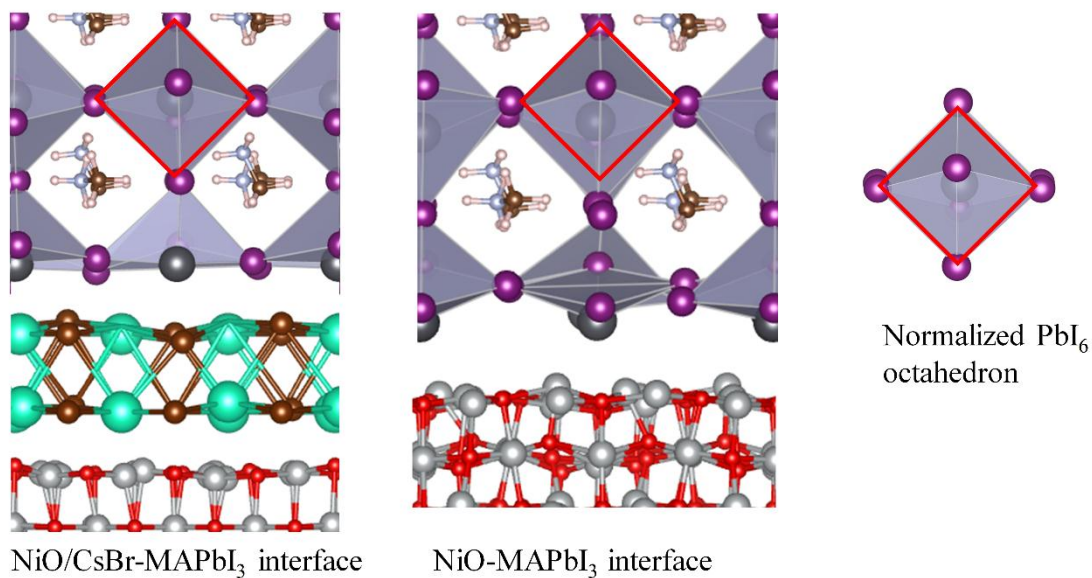

**Figure S3.** Optimized structures of NiO-MAPbI<sub>3</sub> interface with and without CsBr interfacial layer. The normalized PbI<sub>6</sub> octahedron of MAPbI<sub>3</sub> is presented by the red frame.

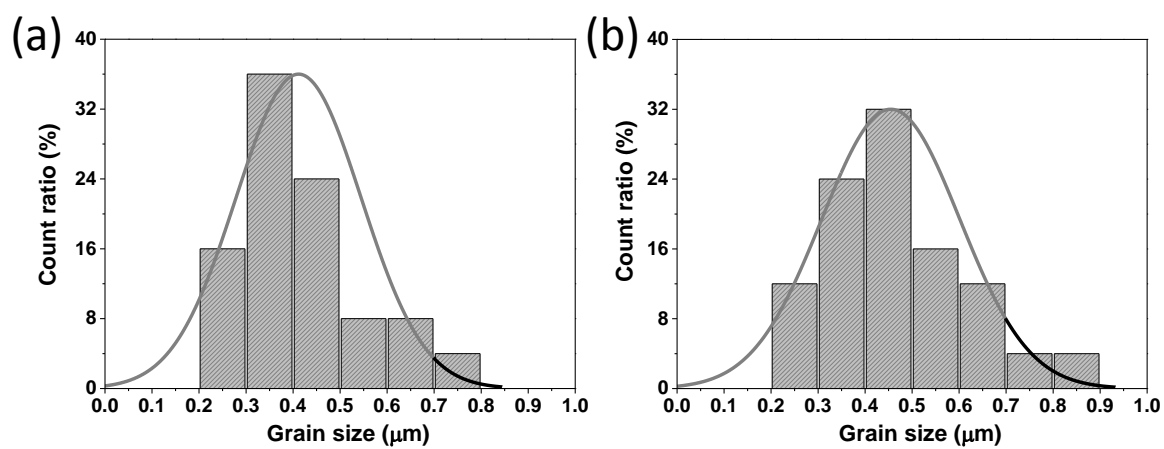

**Figure S4.** The crystal grain sizes based on SEM images of the perovskite thin films modified without and with CsBr, respectively.

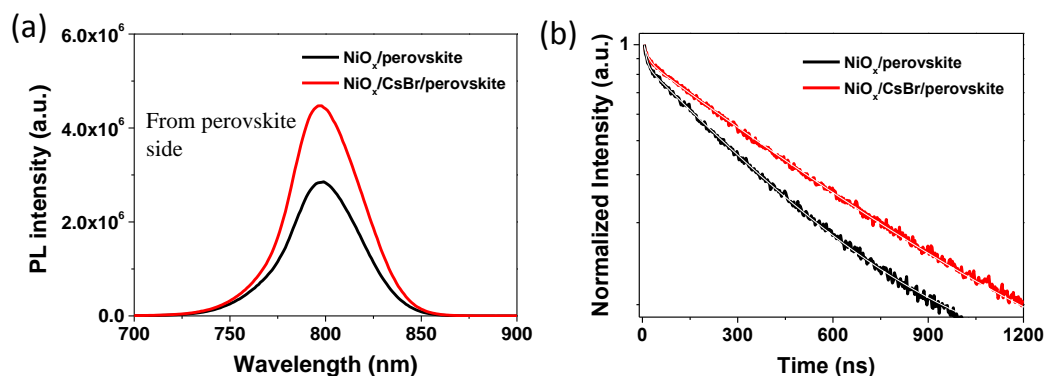

**Figure S5.** Steady-state PL (a) and time-resolved PL (b) spectra of perovskite films deposited on the pristine  $\text{NiO}_x$  and CsBr modified  $\text{NiO}_x$  thin films excited from air side. The average lifetimes are 424 ns for  $\text{NiO}_x$ /perovskite film and 618 ns for  $\text{NiO}_x$ /CsBr/perovskite film, respectively.

**Table R1.** Atomic percentage of the related elements in the thin film structure of (ITO/ $\text{NiO}_x$ /CsBr) and (ITO/ $\text{NiO}_x$ /CsBr/Perovskite (washed by DMF)) measured by EDX.

|                                              | Cs (%) | Pb (%) | I (%) | Br (%) |
|----------------------------------------------|--------|--------|-------|--------|
| $\text{NiO}_x$ /CsBr                         | 1.54   | -0.01  | 0.03  | 1.66   |
| $\text{NiO}_x$ /CsBr/perovskite (DMF washed) | 1.39   | 0.02   | -0.08 | 1.46   |

**Table S2.** Hysteresis behaviors of PSCs prepared on an HTL consisting of pristine  $\text{NiO}_x$  and  $\text{NiO}_x$ /CsBr. The hysteresis index (HI) is defined as  $(\text{PCE}_{\text{reverse}} - \text{PCE}_{\text{forward}}) / \text{PCE}_{\text{reverse}}$ .

| Conditions           |         | $J_{\text{sc}}$<br>( $\text{mA}/\text{cm}^2$ ) | $V_{\text{oc}}$ (V) | FF   | PCE (%) | HI    |
|----------------------|---------|------------------------------------------------|---------------------|------|---------|-------|
| $\text{NiO}_x$       | Reverse | 22.58                                          | 1.08                | 0.73 | 17.89   | 0.45% |
|                      | Forward | 22.88                                          | 1.07                | 0.73 | 17.81   |       |
| $\text{NiO}_x$ /CsBr | Reverse | 23.12                                          | 1.09                | 0.75 | 18.98   | 0.42% |
|                      | Forward | 23.42                                          | 1.08                | 0.75 | 18.90   |       |
